# Supplementary material
Source: MDPI journal article supplement (https://www.mdpi.com/2077-0472/12/12/1981)
Supplement: s1 [file s1]

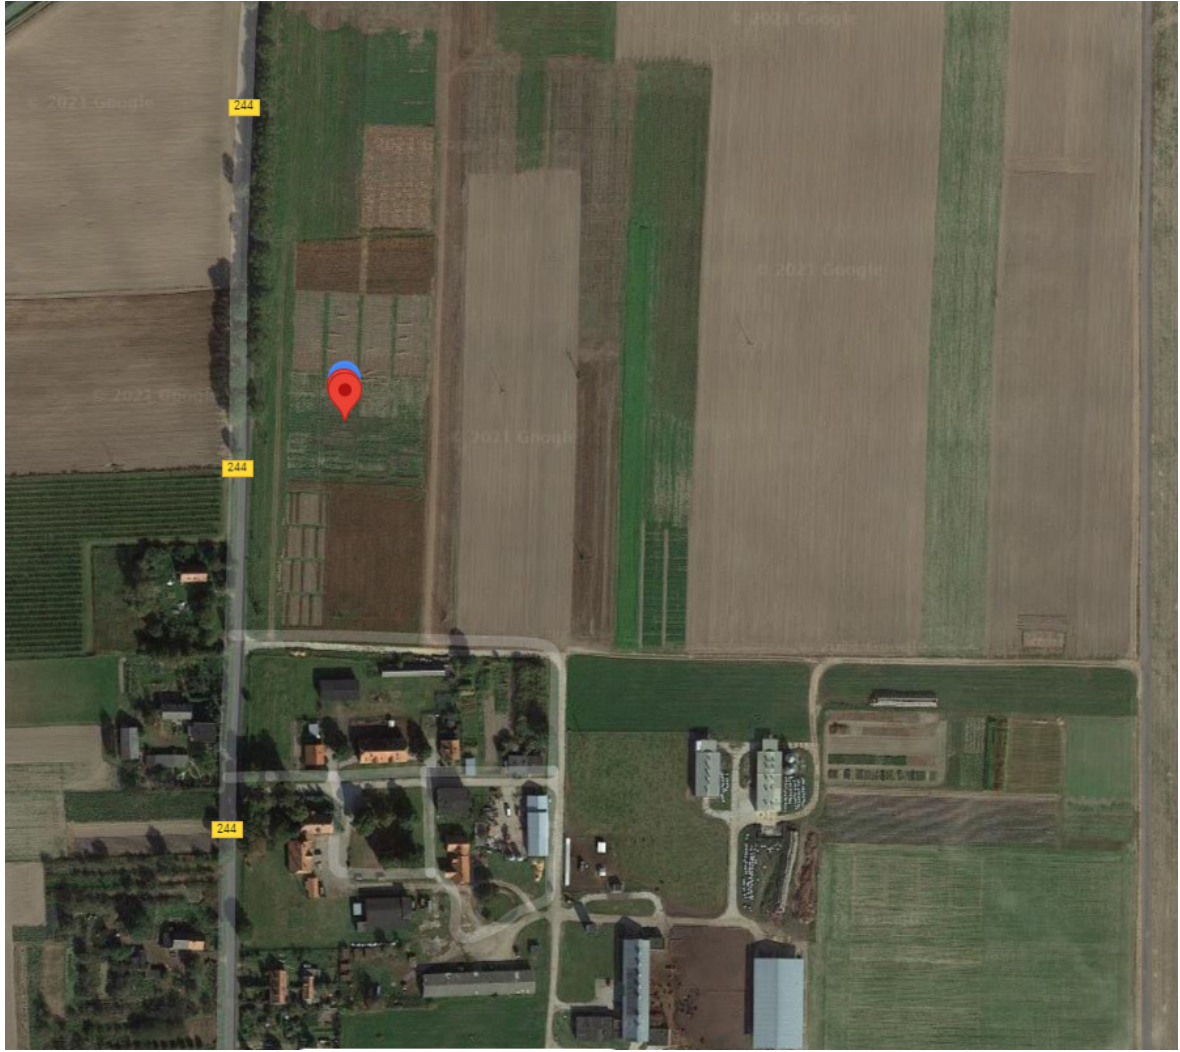

**Figure S1.** Field experiment placement in faculty experimental station.

**Table S1.** Winter wheat genotype names used in the research.

| Winter wheat genotype/cultivar |            |            |                 |          |             |
|--------------------------------|------------|------------|-----------------|----------|-------------|
| Adler                          | Samurai    | Jantarka   | Smaragd         | Kolystar | Symfonia    |
| Alcazar                        | Skagen     | Julius     | Tonacja         | Kuban    | Tacitus     |
| Askalon                        | Torrild    | Juma       | Wysoko-Litweka  | Loyal    | Toras       |
| Barroko                        | Adequat    | Kampana    | Zobel           | Ludwig   | Trend       |
| Bellenus                       | Akratos    | Kaspart    | Adagio          | Lukullus | Tuereg      |
| Brilant                        | Akteur     | Katart     | Alba            | Magnatka | Turkis      |
| Cubus                          | Almari     | Kobra plus | Ambition        | Meteor   | Turnia      |
| Elena                          | Altigo     | Kohelia    | Anthus          | Mewa     | Wydma       |
| Estero                         | Bamberka   | Kranich    | Baryton         | Nadobna  | Zawisza     |
| Expert                         | Banderola  | Kredo      | Batuta          | Olivart  | Zyta        |
| Finezja                        | Boomer     | Legenda    | Benatka kresowa | Olwin    | Arkadia     |
| Flair                          | Bystra     | Monsoon    | Blondynka       | Operetka | Estivus     |
| Florett                        | Centenaire | Naridana   | Bockris         | Profilus | Forum       |
| Global                         | Crackin    | Natula     | Bogatka         | Quibon   | KWS Dacanto |
| Henrik                         | Dorota     | Nutka      | Dekan           | Rapsodia | KWS Ozon    |
| Kobra                          | Drifter    | Ostroga    | Digger          | Rubens   | Oxal        |
| Kris                           | Fidelius   | Pegassos   | Galvano         | Rysa     | Patras      |
| Markiza                        | Figura     | Popstar    | Gecko           | Rywalka  | Pengar      |
| Mulan                          | Flairway   | Rockystar  | Illico          | Sakwa    | Platin      |
| Muszelka                       | Forkida    | Roma       | Jenga           | Satyna   | Sailor      |
| Nateja                         | Fregata    | Scor       | Kepler          | Smuga    | Speedway    |
| Rochvord                       | Garantus   | Slade      | Kobiera         | Sukces   | Tulecka     |
